# Supplementary material for: Reference Gene Selection for Quantitative Real-Time PCR Normalization in Reaumuria soongorica
Source: PubMed Central journal article supplement (PMC4130609; doi:10.1371/journal.pone.0104124), 2014-08-12
Supplement: pone.0104124.s007.pdf [file pone.0104124.s007.pdf]

10 20 30 40 50 60 70 80  
YP\_008575886.1\_Eucalyptus umbr MSPQTETKASVGFKAGVKDYKLYTYYTPEYETKDTDILAAFRVTPQPGVPEEAGAAVAESSTGTWTTVWTDGLTSLDRY  
YP\_008576991.1\_Eucalyptus spat MSPQTETKASVGFKAGVKDYKLYTYYTPEYETKDTDILAAFRVTPQPGVPEEAGAAVAESSTGTWTTVWTDGLTSLDRY  
YP\_008577671.1\_Corymbia macula MSPQTETKASVGFKAGVKDYKLYTYYTPEYETKDTDILAAFRVTPQPGVPEEAGAAVAESSTGTWTTVWTDGLTSLDRY  
YP\_008577076.1\_Eucalyptus torq MSPQTETKASVGFKAGVKDYKLYTYYTPEYETKDTDILAAFRVTPQPGVPEEAGAAVAESSTGTWTTVWTDGLTSLDRY  
AFJ05166.1\_Punica granatum MSPQTETKASVGFKAGVKDYKLYTYYTPEYETKDTDILAAFRVTPQPGVPEEAGAAVAESSTGTWTTVWTDGLTSLDRY  
AAS83539.1\_Toxicodendron orien MSPQTETKASVGFKAGVKDYKLYTYYTPEYETKDTDILAAFRVTPQPGVPEEAGAAVAESSTGTWTTVWTDGLTSLDRY  
ABV65256.1\_Quercus nigra MSPQTETKASVGFKAGVKDYKLYTYYTPEYETKDTDILAAFRVTPQPGVPEEAGAAVAESSTGTWTTVWTDGLTSLDRY  
Unigene19142\_R.soongorica MSPQTETKASVGFKAGVKDYKLYTYYTPEYETKDTDILAAFRVTPQPGVPEEAGAAVAESSTGTWTTVWTDGLTSLDRY

90 100 110 120 130 140 150 160  
YP\_008575886.1\_Eucalyptus umbr KGRCYHIEPVAGEENQYICYVAYPLDLFEEGSVTNMFTSIVGNVFGFKALRALRLEDLRIPTSYTKTFQGPPIHQVERD  
YP\_008576991.1\_Eucalyptus spat KGRCYHIEPVAGEENQYICYVAYPLDLFEEGSVTNMFTSIVGNVFGFKALRALRLEDLRIPTSYTKTFQGPPIHQVERD  
YP\_008577671.1\_Corymbia macula KGRCYHIEPVAGEENQYICYVAYPLDLFEEGSVTNMFTSIVGNVFGFKALRALRLEDLRIPTSYTKTFQGPPIHQVERD  
YP\_008577076.1\_Eucalyptus torq KGRCYHIEPVAGEENQYICYVAYPLDLFEEGSVTNMFTSIVGNVFGFKALRALRLEDLRIPTSYTKTFQGPPIHQVERD  
AFJ05166.1\_Punica granatum KGRCYHIEPVAGEENQYICYVAYPLDLFEEGSVTNMFTSIVGNVFGFKALRALRLEDLRIPTAYTKTFQGPPIHQVERD  
AAS83539.1\_Toxicodendron orien KGRCYHIEPVAGEENQYICYVAYPLDLFEEGSVTNMFTSIVGNVFGFKALRALRLEDLRSPTAYTKTFQGPPIHQVERD  
ABV65256.1\_Quercus nigra KGRCYHIEPVAGEENQYICYVAYPLDLFEEGSVTNMFTSIVGNVFGFKALRALRLEDLRIPTSYTKTFQGPPIHQVERD  
Unigene19142\_R.soongorica KGRCYHIEPVAGEENQYICYVAYPLDLFEEGSVTNMFTSIVGNVFGFKALRALRLEDLRIPTSYTKTFQGPPIHQVERD

170 180 190 200 210 220 230 240  
YP\_008575886.1\_Eucalyptus umbr KLNKYGRPLLGCITKPKLGLSAKNYGRAVYECLRGGLDFTKDDENVNSQPFMRWRDRFLFCAEAIFKSQAETGEIKGHYL  
YP\_008576991.1\_Eucalyptus spat KLNKYGRPLLGCITKPKLGLSAKNYGRAVYECLRGGLDFTKDDENVNSQPFMRWRDRFLFCAEAIFKSQAETGEIKGHYL  
YP\_008577671.1\_Corymbia macula KLNKYGRPLLGCITKPKLGLSAKNYGRAVYECLRGGLDFTKDDENVNSQPFMRWRDRFLFCAEAIFKSQAETGEIKGHYL  
YP\_008577076.1\_Eucalyptus torq KLNKYGRPLLGCITKPKLGLSAKNYGRAVYECLRGGLDFTKDDENVNSQPFMRWRDRFLFCAEAIFKSQAETGEIKGHYL  
AFJ05166.1\_Punica granatum KLNKYGRPLLGCITKPKLGLSAKNYGRAVYECLRGGLDFTKDDENVNSQPFMRWRDRFLFCAEALYKAQAETGEIKGHYL  
AAS83539.1\_Toxicodendron orien KLNKYGRPLLGCITKPKLGLSAKNYGRAVYECLRGGLDFTKDDENVNSQPFMRWRDRFLFCAEALYKAQAETGEIKGHYL  
ABV65256.1\_Quercus nigra KLNKYGRPLLGCITKPKLGLSAKNYGRAVYECLRGGLDFTKDDENVNSQPFMRWRDRFLFCAEAIYKAQAETGEIKGHYL  
Unigene19142\_R.soongorica KLNKYGRPLLGCITKPKLGLSAKNYGRAVYECLRGGLDFTKDDENVNSQPFMRWRDRFLFCAEAIYKAQAETGEIKGHYL

250 260 270 280 290 300 310 320  
YP\_008575886.1\_Eucalyptus umbr NATAGTCEEMIKRAVFARELGVPVIMHDYLTGGFTANTSLAHYCRDNGLLLLHHRAMHAVIDRQKNHGIHFRVLAKALRM  
YP\_008576991.1\_Eucalyptus spat NATAGTCEEMIKRAVFARELGVPVIMHDYLTGGFTANTSLAHYCRDNGLLLLHHRAMHAVIDRQKNHGIHFRVLAKALRM  
YP\_008577671.1\_Corymbia macula NATAGTCEEMIKRAVFARELGVPVIMHDYLTGGFTANTSLAHYCRDNGLLLLHHRAMHAVIDRQKNHGIHFRVLAKALRM  
YP\_008577076.1\_Eucalyptus torq NATAGTCEEMIKRAVFARELGVPVIMHDYLTGGFTANTSLAHYCRDNGLLLLHHRAMHAVIDRQKNHGIHFRVLAKALRM  
AFJ05166.1\_Punica granatum NATAGTCEEMIKRAVFARELGVPVIMHDYLTGGFTANTSLAHYCRDNGLLLLHHRAMHAVIDRQKNHGMHFRVLAKALRM  
AAS83539.1\_Toxicodendron orien NATAGTCEEMIKRAVFARELGVPVIMHDYLTGGFTANTSLAHYCRDNGLLLLHHRAMHAVIDRQKNHGMHFRVLAKALRM  
ABV65256.1\_Quercus nigra NATAGTCEEMIKRAVFARELGVPVIMHDYLTGGFTANTSLAHYCRDNGLLLLHHRAMHAVIDRQKNHGIHFRVLAKALRM  
Unigene19142\_R.soongorica NATAGTCEEMIKRAVFARELGVPVIMHDYLTGGFTANTSLAHYCRDNGLLLLHHRAMHAVIDRQKNHGIHFRVLAKALRM

330 340 350 360 370 380 390 400  
YP\_008575886.1\_Eucalyptus umbr SGGDHIHSGTVVGKLEGERDITLGFVDLLRDDFIEKDRSRGIYFTQDWWVSLPGVLPVASSGGIHWHPALTEIFGDDSVL  
YP\_008576991.1\_Eucalyptus spat SGGDHIHAGTVVGKLEGERDITLGFVDLLRDDFIEKDRSRGIYFTQDWWVSLPGVLPVASSGGIHWHPALTEIFGDDSVL  
YP\_008577671.1\_Corymbia macula SGGDHIHSGTVVGKLEGERDITLGFVDLLRDDFIEKDRSRGIYFTQDWWVSLPGVLPVASSGGIHWHPALTEIFGDDSVL  
YP\_008577076.1\_Eucalyptus torq SGGDHIHAGTVVGKLEGERDITLGFVDLLRDDFIEKDRSRGIYFTQDWWVSLPGVLPVASSGGIHWHPALTEIFGDDSVL  
AFJ05166.1\_Punica granatum SGGDHIHAGTVVGKLEGERDITLGFVDLLRDDFIEKDRSRGIYFTQDWWVSLPGVLPVASSGGIHWHPALTEIFGDDSVL  
AAS83539.1\_Toxicodendron orien SGGDHIHAGTVVGKLEGERDITLGFVDLLRDDFIEKDRSRGIYFTQDWWVSLPGVLPVASSGGIHWHPALTEIFGDDSVL  
ABV65256.1\_Quercus nigra SGGDHIHAGTVVGKLEGERDITLGFVDLLRDDFIEKDRSRGIYFTQDWWVSLPGVLPVASSGGIHWHPALTEIFGDDSVL  
Unigene19142\_R.soongorica SGGDHIHAGTVVGKLEGERDITLGFVDLLRDDFIEKDRSRGIYFTQDWWVSLPGVLPVASSGGIHWHPALTEIFGDDSVL

410 420 430 440 450 460 470  
YP\_008575886.1\_Eucalyptus umbr QFGGGTLGHPWGNAPGAVANRVALEACVQARNEGRDLAREGNEIIREASKWSPELAAACEVWKEIKFEFAMDTL  
YP\_008576991.1\_Eucalyptus spat QFGGGTLGHPWGNAPGAVANRVALEACVQARNEGRDLAREGNEIIREASKWSPELAAACEVWKEIKFEFAMDTL  
YP\_008577671.1\_Corymbia macula QFGGGTLGHPWGNAPGAVANRVALEACVQARNEGRDLAREGNEIIREASKWSPELAAACEVWKEIKFEFAMDTL  
YP\_008577076.1\_Eucalyptus torq QFGGGTLGHPWGNAPGAVANRVALEACVQARNEGRDLAREGNEIIREASKWSPELAAACEVWKEIKFEFAMDTL  
AFJ05166.1\_Punica granatum QFGGGTLGHPWGNAPGAVANRVALEACVQARNEGRDLAREGNEIIREASKWSPELAAACEVWKEIKFEFAMDTL  
AAS83539.1\_Toxicodendron orien QFGGGTLGHPWGNAPGAVANRVALEACVQARNEGRDLAREGNEIIREASKWSPELAAACEVWKEIKFEFAMDTL  
ABV65256.1\_Quercus nigra QFGGGTLGHPWGNAPGAVANRVALEACVQARNEGRDLAREGNEIIREAAKWSPELAAACEVWKEIKFEFAMDTL  
Unigene19142\_R.soongorica QFGGGTLGHPWGNAPGAVANRVALEACVQARNEGRDLAREGNEIIREACKWSPELAAACEVWKEIKFEFAMDTL
